# Supplementary material for: Toxicity of fluoride: critical evaluation of evidence for human developmental neurotoxicity in epidemiological studies, animal experiments and in vitro analyses
Source: PubMed Central journal article supplement (PMC7261729; doi:10.1007/s00204-020-02725-2), 2020-05-08
Supplement: 204_2020_2725_MOESM2_ESM.pdf [file 204_2020_2725_MOESM2_ESM.pdf]

## Online Resource 2

*Archives of Toxicology*

### **Toxicity of fluoride: critical evaluation of evidence for human developmental neurotoxicity in epidemiological studies, animal experiments and in vitro analyses**

Sabine Guth, Stephanie Hüser, Angelika Roth, Gisela Degen, Patrick Diel, Karolina Edlund, Gerhard Eisenbrand, Karl-Heinz Engel, Bernd Epe, Tilman Grune, Volker Heinz, Thomas Henle, Hans-Ulrich Humpf, Henry Jäger, Hans-Georg Joost, Sabine E. Kulling, Alfonso Lampen, Angela Mally, Rosemarie Marchan, Doris Marko, Eva Mühle, Michael A. Nitsche, Elke Röhrdanz, Richard Stadler, Christoph van Thriel, Stefan Vieths, Rudi F. Vogel, Edmund Wascher, Carsten Watzl, Ute Nöthlings, Jan G. Hengstler

#### *Corresponding authors:*

Jan G. Hengstler: Leibniz Research Centre for Working Environment and Human Factors (IfADo), Depart. of Toxicology, Dortmund, Germany. Tel.: +49-231-1084-348. E-Mail: hengstler@ifado.de

Ute Nöthlings: Department of Nutrition and Food Sciences, Nutritional Epidemiology, Rheinische Friedrich-Wilhelms University Bonn, Bonn, Germany. Tel.: +49-0228-73-60490. E-Mail: noethlings@uni-bonn.de

## Online Resource 2 Excluded epidemiological studies

| Reference                    | Reason for exclusion                           |
|------------------------------|------------------------------------------------|
| (Bai et al. 2014)            | Only abstract in English available             |
| (Malin and Till 2015)        | ADHA as endpoint                               |
| (Li et al. 2016)             | Cognitive function as endpoint                 |
| (Valdez Jimenez et al. 2017) | Mental and psychomotor development as endpoint |
| (Barberio et al. 2017)       | Learning disability as endpoint                |
| (Bashash et al. 2018)        | ADHA as endpoint                               |

- Bai A, Li Y, Fan Z, Li X, Li P (2014) Intelligence and growth development of children in coal-burning-borne arsenism and fluorosis areas: an investigation study. *Chinese Journal of Endemiology* 33(2):160-163 doi:10.3760/cma.j.issn.2095-4255.2014.02.011
- Barberio AM, Quinonez C, Hosein FS, McLaren L (2017) Fluoride exposure and reported learning disability diagnosis among Canadian children: Implications for community water fluoridation. *Can J Public Health* 108(3):e229-e239 doi:10.17269/cjph.108.5951
- Bashash M, Marchand M, Hu H, et al. (2018) Prenatal fluoride exposure and attention deficit hyperactivity disorder (ADHD) symptoms in children at 6-12years of age in Mexico City. *Environ Int* 121(Pt 1):658-666 doi:10.1016/j.envint.2018.09.017
- Li M, Gao Y, Cui J, et al. (2016) Cognitive Impairment and Risk Factors in Elderly People Living in Fluorosis Areas in China. *Biol Trace Elem Res* 172(1):53-60 doi:10.1007/s12011-015-0568-0
- Malin AJ, Till C (2015) Exposure to fluoridated water and attention deficit hyperactivity disorder prevalence among children and adolescents in the United States: an ecological association. *Environ Health* 14:17 doi:10.1186/s12940-015-0003-1
- Valdez Jimenez L, Lopez Guzman OD, Cervantes Flores M, et al. (2017) In utero exposure to fluoride and cognitive development delay in infants. *Neurotoxicology* 59:65-70 doi:10.1016/j.neuro.2016.12.011
